# Supplementary material
Source: publisher figshare collection journal article supplement (https://acs.figshare.com/ndownloader/files/20163842)
Supplement: Supplementary file 1 [file 20163842]

## Supporting information

### **Photoinduced Ultrafast Electron Transfer and Charge Transport in the PbI<sub>2</sub>/C<sub>60</sub> Heterojunction**

Chuan-Hui Cheng,<sup>1</sup> \* Bi-Long Zhang,<sup>1, 2</sup> Hang-Qi Song,<sup>1</sup> Yuan Wang,<sup>1</sup> Wen-Hui Li,<sup>1</sup>  
Junxue Liu,<sup>3</sup> Jing Leng,<sup>3</sup> Wenming Tian,<sup>3</sup> Chunyi Zhao,<sup>3</sup> Shengye Jin,<sup>3</sup> Weifeng Liu,<sup>4</sup>  
\* and Shulin Cong<sup>1</sup>

<sup>1</sup>School of Physics, Dalian University of Technology, Dalian 116024 China

<sup>2</sup>723 Research Institute of China Shipbuilding Industry Corporation , Yangzhou  
225000 China

<sup>3</sup>State Key Laboratory of Molecular Reaction Dynamics, Dalian Institute of Chemical  
Physics, Chinese Academy of Sciences, Dalian 116023 China

<sup>4</sup>Mechanical and Electrical Engineering College, Hainan University, Haikou 570228  
China

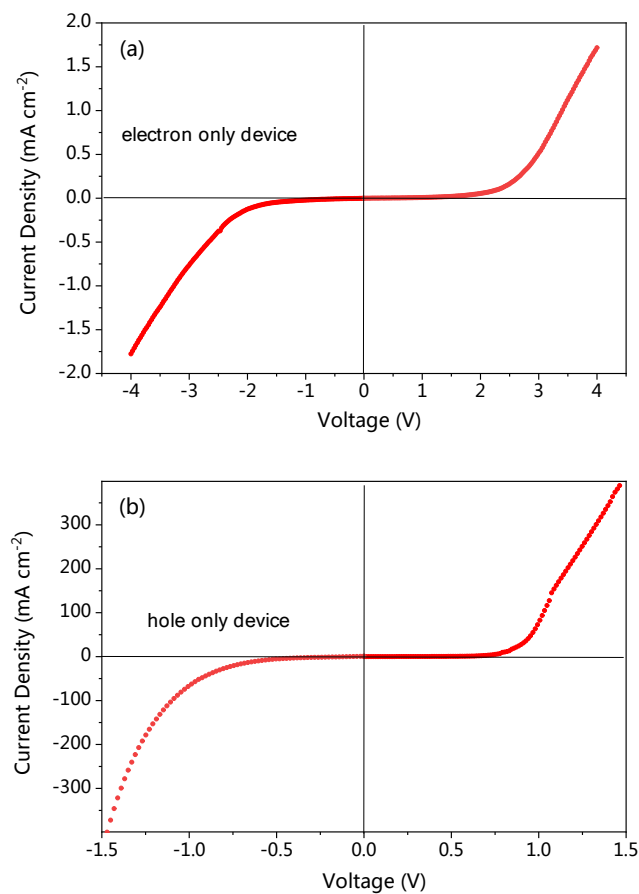

**Figure S1.**  $J$ - $V$  characteristics of **(a)** the electron- and **(b)** hole-only devices under forward and reverse bias. The device architectures were Glass/Al/PbI<sub>2</sub> (100 nm)/Alq<sub>3</sub> : LiF (20 : 1 in weight, 10 nm)/LiF (1.0 nm)/Al, and Glass/Au/MoO<sub>3</sub>(8 nm)/PbI<sub>2</sub> (100 nm)/ MoO<sub>3</sub>(8 nm) /Au. The glass substrate side was defined as positive during measurements.

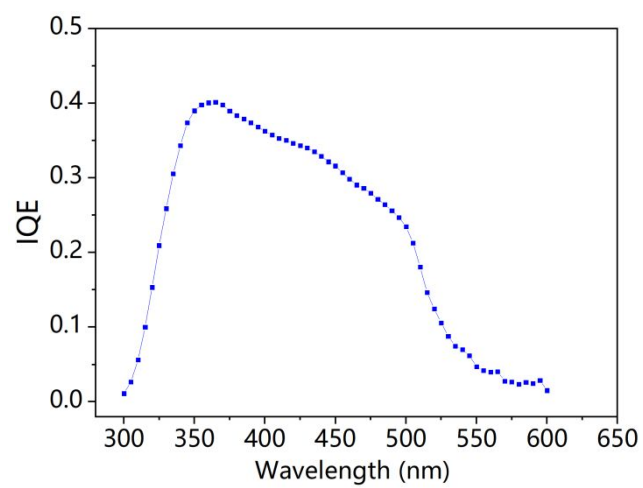

**Figure S2.** IQE spectrum of the solar cell with a  $\text{PbI}_2/\text{C}_{60}$  heterojunction.
